# Supplementary material for: First Record of Microplastic Contamination in the Non-Native Dark False Mussel Mytilopsis leucophaeata (Bivalvia: Dreissenidae) in a Coastal Urban Lagoon
Source: MDPI journal article supplement (doi:10.3390/ijerph21010044), 2023-12-27
Supplement: s1 [file s1]

**Table S1.** Water temperature and salinity in the ten sampling areas at Rodrigo de Freitas Lagoon (Rio de Janeiro, Brazil).

| Sampling area | Temperature (°C) | Salinity (ppt) |
|---------------|------------------|----------------|
| A1            | 12.95            | 28.90          |
| A2            | 13.65            | 29.35          |
| A3            | 13.80            | 28.90          |
| A4            | 12.95            | 28.90          |
| A5            | 12.10            | 29.35          |
| A6            | 12.80            | 28.80          |
| A7            | 13.15            | 29.00          |
| A8            | 12.80            | 31.75          |
| A9            | 12.90            | 30.55          |
| A10           | 12.90            | 30.20          |
